# Supplementary material for: Cytoglobin promotes sensitivity to ferroptosis by regulating p53‐YAP1 axis in colon cancer cells
Source: PubMed Central journal article supplement (PMC8034452; doi:10.1111/jcmm.16400), 2021-02-21
Supplement: JCMM-25-3300-s001.pdf [file JCMM-25-3300-s001.pdf]

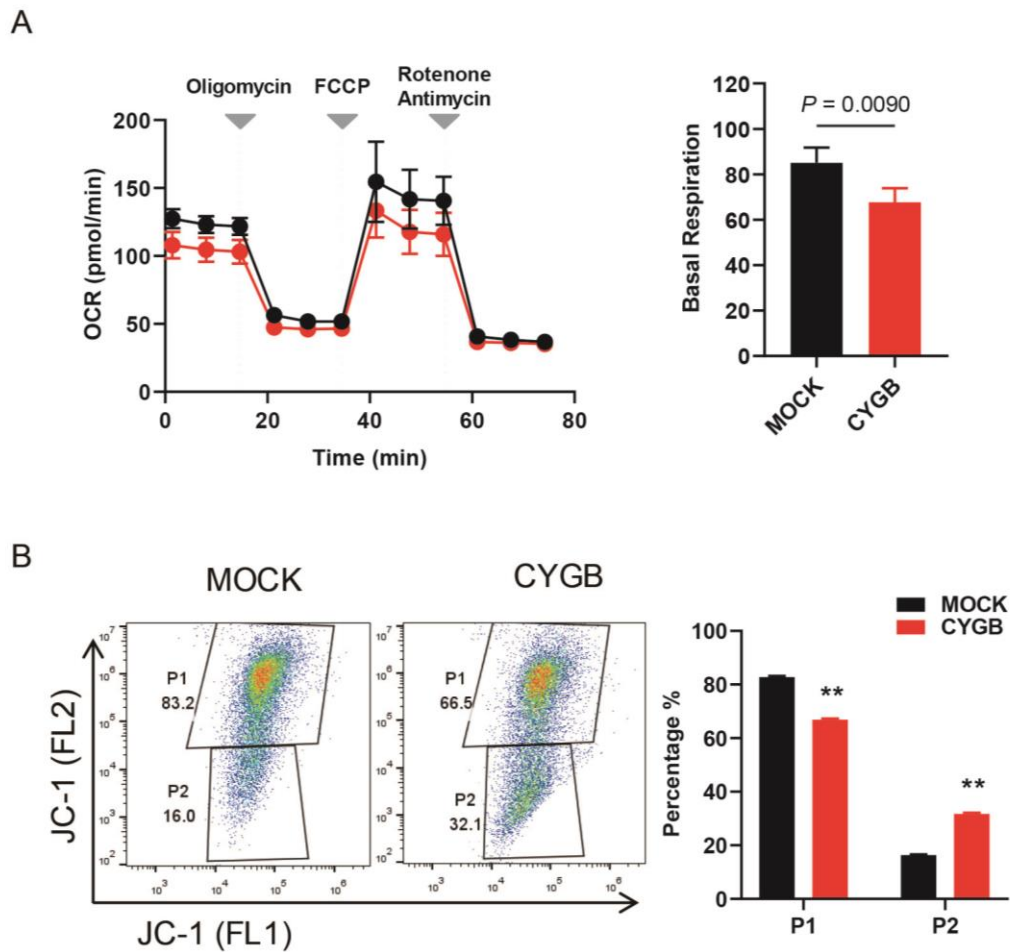

**Figure S1. CYGB disrupted mitochondrial function**

**A.** Oxygen consumption rate (OCR) of the MOCK- and CYGB-overexpressing SW620 cells. Respiratory chain inhibitors were serially added to the culture at the indicated time points. Basal OCRs are shown by subtracting the rotenone/antimycin-treated value from the initial value. **B.** Mitochondrial membrane potential was evaluated by fluorescence staining of mitochondria with the JC-1 dye. Data represent the mean  $\pm$  S.D. of three biological replicates. \* $P < 0.05$ , \*\* $P < 0.01$ .

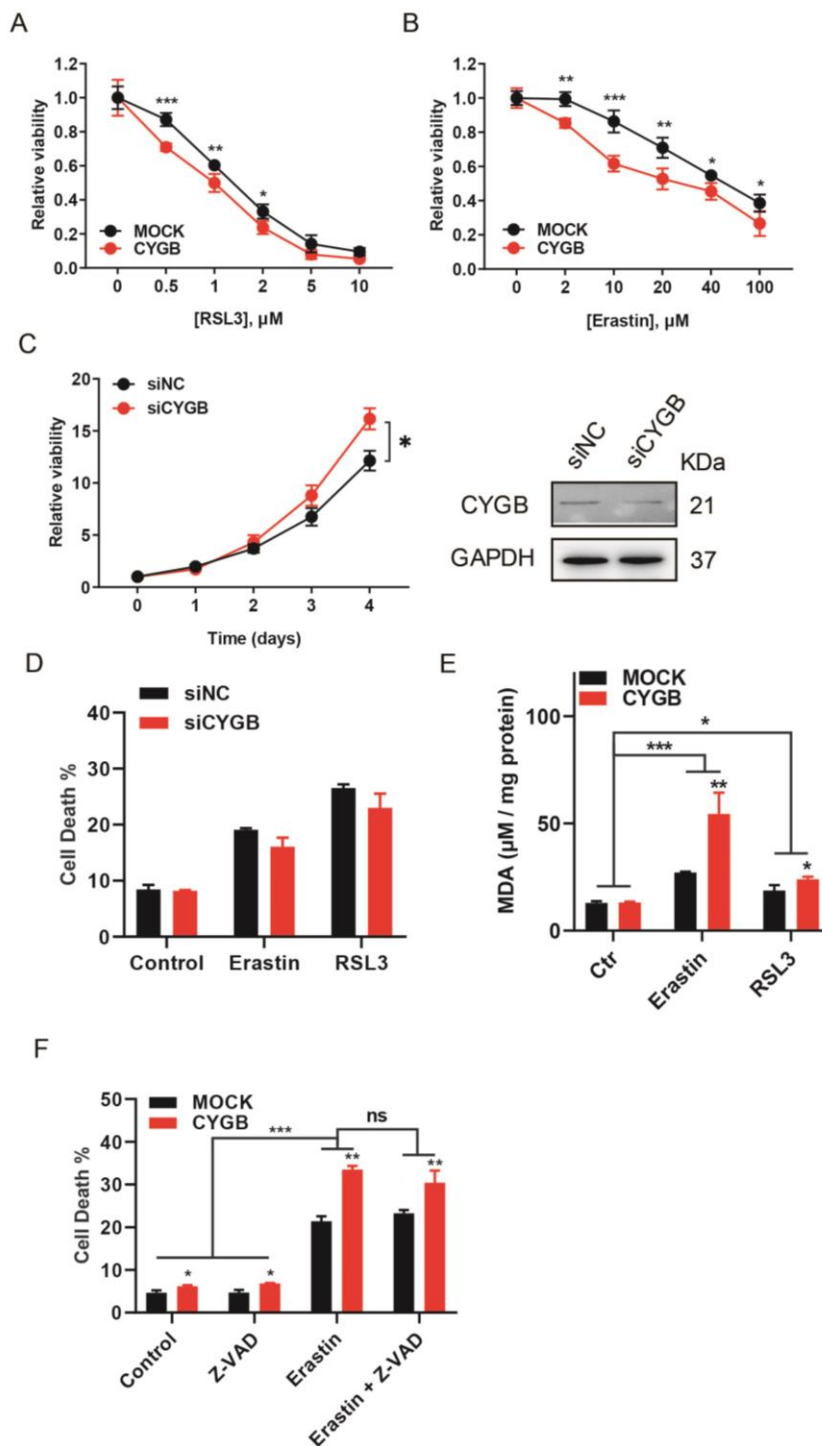

### Figure S2. CYGB increased sensitivity to ferroptosis

**A, B.** Effects of CYGB on cell proliferation after application of the ferroptosis inducers RSL3 (**A**) or erastin (**B**). The indicated concentrations of the inducers were applied, and the cell growth was determined after 48 hours. Relative viability normalized to the untreated condition was used. Data represent the mean  $\pm$  S.D. of three biological replicates. \* $P < 0.05$ , \*\* $P < 0.01$ , and \*\*\* $P < 0.001$ .

**C.** Effects of CYGB knockdown on cell proliferation after CYGB siRNAs (siRNA of CYGB 5'-GGA GGA AUC CCU GAC UCA A-3') mediated knockdown in HCT116 cells. The knockdown efficiency was verified by immunoblotting. **D.** Effects of CYGB knockdown on cell death after the application of ferroptosis inducers RSL3 or erastin. Cell death detection was applied with a 24-hour treatment of ferroptosis inducers RSL3 or erastin after 72 hours CYGB knockdown. **E.** Malondialdehyde (MDA) levels were detected in cells with RSL3 or erastin treatment using a lipid peroxidation MDA assay kit. **F.** Cell death was analyzed with propidium iodide (PI) staining by flow cytometry after the application of Z-VAD, with or without erastin.

**A**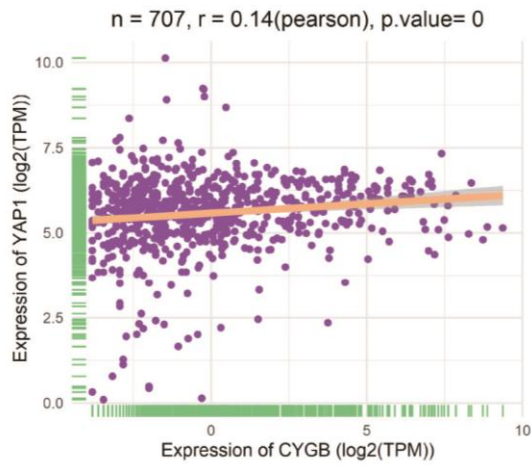**B**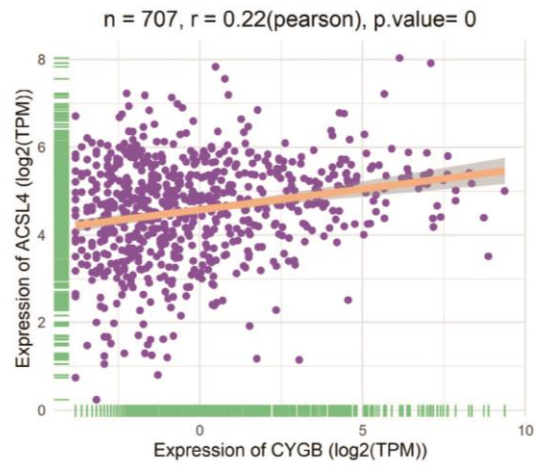

Figure S3. CYGB had the significant correlation with YAP1

A, B. Positive correlations between CYGB and YAP1 (A); and between CYGB and ACSL4 (B) mRNA expression in colon cancer cells from Cancer Cell Line Encyclopedia (CCLE) databases.
